# Supplementary material for: Proteomic mechanistic profile of patients with diabetes at risk of developing heart failure: insights from the HOMAGE trial
Source: Springer Nature journal article supplement (doi:10.1186/s12933-021-01357-9), 2021-08-09
Supplement: MOESM1 [file 12933_2021_1357_MOESM1_ESM.pdf]

**Table S1.** Protein names and respective Olink® panel sorted in alphabetical order

| Protein full name                                                | Entry name   | Olink® Panel* | Uniprot ID** |
|------------------------------------------------------------------|--------------|---------------|--------------|
| Angiotensin-converting enzyme 2                                  | ACE2         | CVD II        | Q9BYF1       |
| Adenosine Deaminase                                              | ADA          | INF           | P00813       |
| Adisintegrin and metalloproteinase with thrombospondin motifs 13 | ADAMTS13     | CVD II        | Q76LX8       |
| ADM                                                              | ADM          | CVD II        | P35318       |
| Agouti-related protein                                           | AGRP         | CVD II        | O00253       |
| CD166 antigen                                                    | ALCAM        | CVD III       | Q13740       |
| Protein AMBP                                                     | AMBP         | CVD II        | P02760       |
| Angiopoietin-1                                                   | ANG1         | CVD II        | Q15389       |
| Aminopeptidase N                                                 | APN          | CVD III       | P15144       |
| Axin-1                                                           | AXIN1        | INF           | O15169       |
| Tyrosine-protein kinase receptor UFO                             | AXL          | CVD III       | P30530       |
| Azurocidin                                                       | AZU1         | CVD III       | P20160       |
| Brain-derived neurotrophic factor                                | BDNF         | INF           | P23560       |
| Beta-nerve growth factor                                         | BETANGF      | INF           | P01138       |
| Bleomycin hydrolase                                              | BLMHYDROLASE | CVD III       | Q13867       |
| Bone morphogenetic protein 6                                     | BMP6         | CVD II        | P22004       |
| Natriuretic peptides B                                           | BNP          | CVD II        | P16860       |
| Eukaryotic translation initiation factor 4E-binding protein 1    | BP1_4E       | INF           | Q13541       |
| Carbonic anhydrase 5A, mitochondrial                             | CA5A         | CVD II        | P35218       |
| Caspase-3                                                        | CASP3        | CVD III       | P42574       |
| Caspase 8                                                        | CASP8        | INF           | Q14790       |
| Eotaxin-1                                                        | CCL11        | INF           | P51671       |
| C-C motif chemokine 15                                           | CCL15        | CVD III       | Q16663       |
| C-C motif chemokine 16                                           | CCL16        | CVD III       | O15467       |
| C-C motif chemokine 17                                           | CCL17        | CVD II        | Q92583       |
| C-C motif chemokine 19                                           | CCL19        | INF           | Q99731       |
| C-C motif chemokine 20                                           | CCL20        | INF           | P78556       |
| C-C motif chemokine 22                                           | CCL22        | CVD III       | O00626       |
| C-C motif chemokine 23                                           | CCL23        | INF           | P55773       |
| C-C motif chemokine 24                                           | CCL24        | CVD III       | O00175       |
| C-C motif chemokine 25                                           | CCL25        | INF           | O15444       |
| C-C motif chemokine 28                                           | CCL28        | INF           | Q9NRJ3       |
| C-C motif chemokine 3                                            | CCL3         | CVD II        | P10147       |
| C-C motif chemokine 4                                            | CCL4         | INF           | P13236       |
| Scavenger receptor cysteine-rich type 1 protein M130             | CD163        | CVD III       | Q86VB7       |
| Natural killer cell receptor 2B4                                 | CD244        | INF           | Q9BZW8       |
| T-cell surface glycoprotein CD4                                  | CD4          | CVD II        | P01730       |
| CD40L receptor                                                   | CD40         | INF           | P25942       |
| CD40 ligand                                                      | CD40L        | CVD II        | P29965       |
| T-cell surface glycoprotein CD5                                  | CD5          | INF           | P06127       |
| T cell surface glycoprotein CD6                                  | CD6          | INF           | P30203       |
| SLAM family member 5                                             | CD84         | CVD II        | Q9UIB8       |
| Complement component C1q receptor                                | CD93         | CVD III       | Q9NPY3       |
| CUB domain-containing protein 1                                  | CDCP1        | INF           | Q9H5V8       |
| Cadherin-5                                                       | CDH5         | CVD III       | P33151       |
| Carcinoembryonic antigenrelated cell adhesion molecule 8         | CEACAM8      | CVD II        | P31997       |
| Chitinase-3-like protein 1                                       | CHI3L1       | CVD III       | P36222       |

|                                                               |        |         |        |
|---------------------------------------------------------------|--------|---------|--------|
| Chitotriosidase-1                                             | CHIT1  | CVD III | Q13231 |
| Contactin-1                                                   | CNTN1  | CVD III | Q12860 |
| Collagen alpha-1(I) chain                                     | COL1A1 | CVD III | P02452 |
| Carboxypeptidase A1                                           | CPA1   | CVD III | P15085 |
| Carboxypeptidase B                                            | CPB1   | CVD III | P15086 |
| Macrophage colony-stimulating factor 1                        | CSF1   | INF     | P09603 |
| Cystatin D                                                    | CST5   | INF     | P28325 |
| Cystatin-B                                                    | CSTB   | CVD III | P04080 |
| Chymotrypsin C                                                | CTRC   | CVD II  | Q99895 |
| Cathepsin D                                                   | CTSD   | CVD III | P07339 |
| Cathepsin L1                                                  | CTSL1  | CVD II  | P07711 |
| Cathepsin Z                                                   | CTSZ   | CVD III | Q9UBR2 |
| Fractalkine                                                   | CX3CL1 | INF     | P78423 |
| C-X-C motif chemokine 1 (CVD2)                                | CXCL1  | CVD II  | P09341 |
| C-X-C motif chemokine 10                                      | CXCL10 | INF     | P02778 |
| C-X-C motif chemokine 11                                      | CXCL11 | INF     | O14625 |
| C-X-C motif chemokine 16                                      | CXCL16 | CVD III | Q9H2A7 |
| C-X-C motif chemokine 5                                       | CXCL5  | INF     | P42830 |
| C-X-C motif chemokine 6                                       | CXCL6  | INF     | P80162 |
| C-X-C motif chemokine 9                                       | CXCL9  | INF     | Q07325 |
| Decorin                                                       | DCN    | CVD II  | P07585 |
| 2,4-dienoyl-CoA reductase, mitochondrial                      | DECR1  | CVD II  | Q16698 |
| Dickkopf-related protein 1                                    | DKK1   | CVD II  | O94907 |
| Azurocidin                                                    | DLK1   | CVD III | P80370 |
| Delta and Notch-like epidermal growth factor-related receptor | DNER   | INF     | Q8NFT8 |
| Epidermal growth factor receptor                              | EGFR   | CVD III | P00533 |
| Protein S100-A12                                              | ENRAGE | INF     | P80511 |
| Epithelial cell adhesion molecule                             | EPCAM  | CVD III | P16422 |
| Ephrin type-B receptor 4                                      | EPHB4  | CVD III | P54760 |
| Fatty acid-binding protein, intestinal                        | FABP2  | CVD II  | P12104 |
| Fatty acid-binding protein, adipocyte                         | FABP4  | CVD III | P15090 |
| Tumor necrosis factor receptor superfamily member 6           | FAS    | CVD III | P25445 |
| Fibroblast growth factor 19                                   | FGF19  | INF     | O95750 |
| Fibroblast growth factor 21 (CVD2)                            | FGF21  | CVD II  | Q9NSA1 |
| Fibroblast growth factor 23 (CVD2)                            | FGF23  | CVD II  | Q9GZV9 |
| Fibroblast growth factor 5                                    | FGF5   | INF     | P12034 |
| Fms-related tyrosine kinase 3 ligand                          | FLT3L  | INF     | P49771 |
| Follistatin                                                   | FS     | CVD II  | P19883 |
| Galectin-3                                                    | GAL3   | CVD III | P17931 |
| Galectin-4                                                    | GAL4   | CVD III | P56470 |
| Galectin-9                                                    | GAL9   | CVD II  | O00182 |
| Growth/differentiation factor 15                              | GDF15  | CVD III | Q99988 |
| Growth/differentiation factor 2                               | GDF2   | CVD II  | Q9UK05 |
| Growth hormone                                                | GH     | CVD II  | P01241 |
| Gastric intrinsic factor                                      | GIF    | CVD II  | P27352 |
| Lactoylglutathione lyase                                      | GLO1   | CVD II  | Q04760 |
| Granulins                                                     | GRN    | CVD III | P28799 |
| Gastrotropin                                                  | GT     | CVD II  | P51161 |
| Hydroxyacid oxidase 1                                         | HAOX1  | CVD II  | Q9UJM8 |
| Proheparin-binding EGF-like growth factor                     | HBEGF  | CVD II  | Q99075 |
| Glial cell line-derived neurotrophic factor                   | HGDNF  | INF     | P39905 |
| Hepatocyte growth factor                                      | HGF    | INF     | P14210 |
| Heme oxygenase 1                                              | HO1    | CVD II  | P09601 |

|                                                              |                   |         |        |
|--------------------------------------------------------------|-------------------|---------|--------|
| Osteoclast-associated immunoglobulin-like receptor           | HOSCAR            | CVD II  | Q8IYS5 |
| Heat shock 27 kDa protein                                    | HSP27             | CVD II  | P04792 |
| Intercellular adhesion molecule 2                            | ICAM2             | CVD III | P13598 |
| Alpha-L-iduronidase                                          | IDUA              | CVD II  | P35475 |
| Insulin-like growth factor-binding protein 1                 | IGFBP1            | CVD III | P08833 |
| Insulin-like Growth Factor-Binding Protein 2                 | IGFBP2            | CVD III | P18065 |
| Insulin-like growth factor-binding protein 7                 | IGFBP7            | CVD III | Q16270 |
| Low affinity immunoglobulin gamma Fc region receptor II-b    | IGGFCRECEPTOR IIB | CVD II  | P31994 |
| Interleukin-10                                               | IL10              | INF     | P22301 |
| Interleukin-10 receptor subunit alpha                        | IL10RA            | INF     | Q13651 |
| Interleukin-10 receptor subunit beta                         | IL10RB            | INF     | Q08334 |
| Interleukin-12 subunit beta                                  | IL12B             | INF     | P29460 |
| Interleukin-13                                               | IL13              | INF     | P35225 |
| Interleukin-15 receptor subunit alpha                        | IL15RA            | INF     | Q13261 |
| Pro-interleukin-16                                           | IL16              | CVD II  | Q14005 |
| Interleukin-17A                                              | IL17A             | INF     | Q16552 |
| Interleukin-17C                                              | IL17C             | INF     | Q9P0M4 |
| Interleukin-17D                                              | IL17D             | CVD II  | Q8TAD2 |
| Interleukin-17 receptor A                                    | IL17RA            | CVD III | Q96F46 |
| Interleukin-18 (CVD2)                                        | IL18              | CVD II  | Q14116 |
| Interleukin-18-binding protein                               | IL18BP            | CVD III | O95998 |
| Interleukin-18 receptor 1                                    | IL18R1            | INF     | Q13478 |
| Interleukin-1 receptor antagonist protein                    | IL1RA             | CVD II  | P18510 |
| Interleukin-1 receptor-like 2                                | IL1RL2            | CVD II  | Q9HB29 |
| Interleukin-1 receptor type 1                                | IL1RT1            | CVD III | P14778 |
| Interleukin-1 receptor type 2                                | IL1RT2            | CVD III | P27930 |
| Interleukin-20 receptor subunit alpha                        | IL20RA            | INF     | Q9UHF4 |
| Interleukin-27                                               | IL27              | CVD II  | Q8NEV9 |
| Interleukin-2 receptor subunit alpha                         | IL2RA             | CVD III | P01589 |
| Interleukin-4 receptor subunit alpha                         | IL4RA             | CVD II  | P24394 |
| Interleukin-6 (CVD2)                                         | IL6               | CVD II  | P05231 |
| Interleukin-6 receptor subunit alpha                         | IL6RA             | CVD III | P08887 |
| Interleukin-7                                                | IL7               | INF     | P13232 |
| Interleukin-8                                                | IL8               | INF     | P10145 |
| Melusin                                                      | ITGB1BP2          | CVD II  | Q9UKP3 |
| Integrin beta-2                                              | ITGB2             | CVD III | P05107 |
| Junctional adhesion molecule A                               | JAMA              | CVD III | Q9Y624 |
| Kidney injury molecule 1                                     | KIM1              | CVD II  | Q96D42 |
| Kallikrein-6                                                 | KLK6              | CVD III | Q92876 |
| Latency-associated peptide transforming growth factor beta 1 | LAPTGF BETA1      | INF     | P01137 |
| Low-density lipoprotein receptor                             | LDLRECEPTOR       | CVD III | P01130 |
| Leptin                                                       | LEP               | CVD II  | P41159 |
| Leukemia inhibitory factor receptor                          | LIFR              | INF     | P42702 |
| Lectin-like oxidized LDL receptor 1                          | LOX1              | CVD II  | P78380 |
| Lipoprotein lipase                                           | LPL               | CVD II  | P06858 |
| Lymphotoxin-beta receptor                                    | LTBR              | CVD III | P36941 |
| Macrophage receptor MARCO                                    | MARCO             | CVD II  | Q9UEW3 |
| Myoglobin                                                    | MB                | CVD III | P02144 |
| Monocyte chemotactic protein 1                               | MCP1_CVD3         | CVD III | P13500 |
| Monocyte chemotactic protein 2                               | MCP2              | INF     | P80075 |
| Monocyte chemotactic protein 3                               | MCP3              | INF     | P80098 |
| Monocyte chemotactic protein 4                               | MCP4              | INF     | Q99616 |

|                                                            |              |         |        |
|------------------------------------------------------------|--------------|---------|--------|
| Matrix extracellular phosphoglycoprotein                   | MEPE         | CVD III | Q9NQ76 |
| Tyrosine-protein kinase Mer                                | MERTK        | CVD II  | Q12866 |
| Matrix metalloproteinase-1                                 | MMP1         | INF     | P03956 |
| Matrix metalloproteinase-10                                | MMP10        | INF     | P09238 |
| Matrix metalloproteinase-12                                | MMP12        | CVD II  | P39900 |
| Matrix metalloproteinase-2                                 | MMP2         | CVD III | P08253 |
| Matrix metalloproteinase-3                                 | MMP3         | CVD III | P08254 |
| Matrix metalloproteinase-7                                 | MMP7         | CVD II  | P09237 |
| Matrix metalloproteinase-9                                 | MMP9         | CVD III | P14780 |
| Myeloperoxidase                                            | MPO          | CVD III | P05164 |
| NF-kappa-B essential modulator                             | NEMO         | CVD II  | Q9Y6K9 |
| Neurogenic locus notch homolog protein 3                   | NOTCH3       | CVD III | Q9UM47 |
| Neurotrophin-3                                             | NT3          | INF     | P20783 |
| N-terminal prohormone brain natriuretic peptide            | NTPROBNP     | CVDII   | P16860 |
| Osteoprotegerin                                            | OPG_CVD3     | CVD III | O00300 |
| Osteopontin                                                | OPN          | CVD III | P10451 |
| Oncostatin-M                                               | OSM          | INF     | P13725 |
| Plasminogen activator inhibitor 1                          | PAI          | CVD III | P05121 |
| Pappalysin-1                                               | PAPPA        | CVD II  | Q13219 |
| Proteinase-activated receptor 1                            | PAR1         | CVD II  | P25116 |
| Poly [ADP-ribose] polymerase 1                             | PARP1        | CVD II  | P09874 |
| Proprotein convertase subtilisin/kexin type 9              | PCSK9        | CVD III | Q8NBP7 |
| Platelet-derived growth factor subunit A                   | PDGFSUBUNITA | CVD III | P04085 |
| Platelet-derived growth factor subunit B                   | PDGFSUBUNITB | CVD II  | P01127 |
| Programmed cell death 1 ligand 1                           | PDL1         | INF     | Q9NZQ7 |
| Programmed cell death 1 ligand 2                           | PDL2         | CVD II  | Q9BQ51 |
| Platelet endothelial cell adhesion molecule                | PECAM1       | CVD III | P16284 |
| Peptidoglycan recognition protein 1                        | PGLYRP1      | CVD III | O75594 |
| Elafin                                                     | PI3          | CVD III | P19957 |
| Polymeric immunoglobulin receptor                          | PIGR         | CVD II  | P01833 |
| Perlecan                                                   | PLC          | CVD III | P98160 |
| Placenta growth factor                                     | PLGF         | CVD II  | P49763 |
| Paraoxonase (PON 3)                                        | PON3         | CVD III | Q15166 |
| Prolargin                                                  | PRELP        | CVD II  | P51888 |
| Brother of CDO                                             | PROTEINBOC   | CVD II  | Q9BWW1 |
| Serine protease 27                                         | PRSS27       | CVD II  | Q9BQR3 |
| Prostasin                                                  | PRSS8        | CVD II  | Q16651 |
| Myeloblastin                                               | PRTN3        | CVD III | P24158 |
| P-selectin glycoprotein ligand 1                           | PSGL1        | CVD II  | Q14242 |
| Pulmonary surfactant-associated protein D                  | PSPD         | CVD III | P35247 |
| Pentraxin-related protein PTX3                             | PTX3         | CVD II  | P26022 |
| Receptor for advanced glycosylation end products           | RAGE         | CVD II  | Q15109 |
| Retinoic acid receptor responder protein 2                 | RARRES2      | CVD III | Q99969 |
| Renin                                                      | REN          | CVD II  | P00797 |
| Resistin                                                   | RETN         | CVD III | Q9HD89 |
| Stem cell factor (CVD2)                                    | SCF          | CVD II  | P21583 |
| Secretoglobin family 3A member 2                           | SCGB3A2      | CVD III | Q96PL1 |
| E-selectin                                                 | SELE         | CVD III | P16581 |
| P-selectin                                                 | SELP         | CVD III | P16109 |
| Serpin A12                                                 | SERPINA12    | CVD II  | Q8IW75 |
| Tyrosine-protein phosphatase non-receptor type substrate 1 | SHPS1        | CVD III | P78324 |
| SIR2-like protein 2                                        | SIRT2        | INF     | Q8IXJ6 |
| Signaling lymphocytic activation molecule                  | SLAMF1       | INF     | Q13291 |

|                                                       |           |         |        |
|-------------------------------------------------------|-----------|---------|--------|
| SLAM family member 7                                  | SLAMF7    | CVD II  | Q9NQ25 |
| Superoxide dismutase [Mn], mitochondrial              | SOD2      | CVD II  | P04179 |
| Sortilin                                              | SORT1     | CVD II  | Q99523 |
| Spondin-1                                             | SPON1     | CVD III | Q9HCB6 |
| Spondin-2                                             | SPON2     | CVD II  | Q9BUD6 |
| Proto-oncogene tyrosine-protein kinase Src            | SRC       | CVD II  | P12931 |
| Sulfotransferase 1A1                                  | ST1A1     | INF     | P50225 |
| ST2 protein                                           | ST2       | CVD III | Q01638 |
| STAM-binding protein                                  | STAMPB    | INF     | O95630 |
| Serine/threonine-protein kinase 4                     | STK4      | CVD II  | Q13043 |
| Tissue factor                                         | TF        | CVD II  | P13726 |
| Trefoil factor 3                                      | TFF3      | CVD III | Q07654 |
| Tissue factor pathway inhibitor                       | TFPI      | CVD III | P10646 |
| Transforming growth factor alpha                      | TGFALPHA  | INF     | P01135 |
| Protein-glutamine gamma-glutamyltransferase 2         | TGM2      | CVD II  | P21980 |
| Thrombospondin-2                                      | THBS2     | CVD II  | P35442 |
| Thrombopoietin                                        | THPO      | CVD II  | P40225 |
| Angiopoietin-1 receptor                               | TIE2      | CVD II  | Q02763 |
| Metalloproteinase inhibitor 4                         | TIMP4     | CVD III | Q99727 |
| Trem-like transcript 2 protein                        | TLT2      | CVD III | Q5T2D2 |
| Thrombomodulin                                        | TM        | CVD II  | P07204 |
| Tumor necrosis factor                                 | TNF       | INF     | P01375 |
| TNF-beta                                              | TNFB      | INF     | P01374 |
| Tumor necrosis factor receptor 1                      | TNFR1     | CVD III | P19438 |
| Tumor necrosis factor receptor 2                      | TNFR2     | CVD III | P20333 |
| Tumor necrosis factor receptor superfamily member 10A | TNFRSF10A | CVD II  | O00220 |
| Tumor necrosis factor receptor superfamily member 10C | TNFRSF10C | CVD III | O14798 |
| Tumor necrosis factor receptor superfamily member 11A | TNFRSF11A | CVD II  | Q9Y6Q6 |
| Tumor necrosis factor receptor superfamily member 13B | TNFRSF13B | CVD II  | O14836 |
| Tumor necrosis factor receptor superfamily member 14  | TNFRSF14  | CVD III | Q92956 |
| Tumor necrosis factor receptor superfamily member 9   | TNFRSF9   | INF     | Q07011 |
| Tumor necrosis factor ligand superfamily member 13B   | TNFSF13B  | CVD III | Q9Y275 |
| Tumor necrosis factor ligand superfamily member 14    | TNFSF14   | INF     | O43557 |
| Tissue-type plasminogen activator                     | TPA       | CVD III | P00750 |
| Transferrin receptor protein 1                        | TR        | CVD III | P02786 |
| TNF-related apoptosis-inducing ligand                 | TRAIL     | INF     | P50591 |
| TNF-related apoptosis-inducing ligand receptor 2      | TRAILR2   | CVD II  | O14763 |
| TNF-related activation-induced cytokine               | TRANCE    | INF     | O14788 |
| Tartrate-resistant acid phosphatase type 5            | TRAP      | CVD III | P13686 |
| Tumor necrosis factor (Ligand) superfamily, member 12 | TWEAK     | INF     | O43508 |
| Urokinase-type plasminogen activator                  | UPA_CVD3  | CVD III | P00749 |
| Urokinase plasminogen activator surface receptor      | UPAR      | CVD III | Q03405 |
| Vascular endothelial growth factor A                  | VEGFA     | INF     | P15692 |
| Vascular endothelial growth factor D                  | VEGFD     | CVD II  | O43915 |
| V-set and immunoglobulin domain-containing protein 2  | VSIG2     | CVD II  | Q96IQ7 |
| von Willebrand factor                                 | VWF       | CVD III | P04275 |
| Lymphotoctin                                          | XCL1      | CVD II  | P47992 |

**Table S2.** Pathway enrichment analysis using GO terms.

| <b>GO-term</b> | <b>Pathway</b>                            | <b>FDRq</b> | <b>Included proteins</b>                                                                         |
|----------------|-------------------------------------------|-------------|--------------------------------------------------------------------------------------------------|
| GO:0034097     | Response to cytokine                      | 0.0000269   | <i>CCL15, CCL11, CXCL10, SELE, PSGL1, IL1R1, IL10, LIFR, IL18R1, OPG, COL1A1</i>                 |
| GO:0071345     | Cellular response to cytokine stimulus    | 0.0000472   | <i>CCL15, CCL11, CXCL10, PSGL1, IL1R1, IL10, LIFR, IL18R1, OPG, COL1A1</i>                       |
| GO:0050900     | Leukocyte migration                       | 0.0000472   | <i>CCL15, CCL11, CXCL10, SELE, PSGL1, IL10, COL1A1</i>                                           |
| GO:0006954     | Inflammatory response                     | 0.0000472   | <i>CCL15, CCL11, CXCL10, SELE, IL1R1, IL10, IL18R1, OPG</i>                                      |
| GO:0002376     | Immune system process                     | 0.0000472   | <i>CCL15, CCL11, CXCL10, SELE, PSGL1, IL1R1, IL10, IL18R1, FST, OPG, COL1A1, CTSD, CTSZ, GRN</i> |
| GO:0019221     | Cytokine-mediated signalling pathway      | 0.00023     | <i>CCL15, CCL11, CXCL10, IL1R1, IL10, LIFR, IL18R1, OPG</i>                                      |
| GO:0010469     | Regulation of signaling receptor activity | 0.0011      | <i>CCL15, CCL11, CXCL10, IL10, GRN, GDF15, OPG</i>                                               |
| GO:0034612     | Response to tumor necrosis factor         | 0.0012      | <i>CCL15, CCL11, SELE, OPG, COL1A1</i>                                                           |
| GO:0006955     | Immune response                           | 0.0015      | <i>CCL15, CCL11, CXCL10, IL1R1, IL10, IL18R1, OPG, CTSD, CTSZ, GRN</i>                           |
| GO:0030595     | Leukocyte chemotaxis                      | 0.0027      | <i>CCL15, CCL11, CXCL10, IL10</i>                                                                |

**Table S3.** Proteins which are significantly altered in diabetic patients after 9 months of spironolactone treatment.

|                                                   | Co-efficient (95% CI)  | p-value |
|---------------------------------------------------|------------------------|---------|
| <i>Decreased after 9 months of spironolactone</i> |                        |         |
| <b>COL1A1</b>                                     | -0.14 (-0.2 – -0.08)   | 0.00001 |
| <b>PICP</b>                                       | -8.03 (-11.85 – -4.22) | 0.00004 |
| <b>SELE</b>                                       | -0.09 (-0.16 – -0.02)  | 0.01    |
| <i>Increased after 9 months of spironolactone</i> |                        |         |
| <b>MMP7</b>                                       | 0.1 (0.03 – 0.18)      | 0.009   |

**Table S4.** Interaction analysis between diabetic status of the patients and spironolactone treatment for the primary and secondary outcomes of the HOMAGE trial.

|                                 | No diabetes<br>Co-efficient (95% CI) | Diabetes<br>Co-efficient (95% CI) | Interaction p-value<br>(diabetes*spironolactone) |
|---------------------------------|--------------------------------------|-----------------------------------|--------------------------------------------------|
| <b>PICP</b>                     | -9.41 (-14.42--4.41)                 | -6.13 (-12.05--0.21)              | 0.39                                             |
| <b>PIIINP</b>                   | -0.09 (-0.48-0.31)                   | -0.24 (-0.69-0.2)                 | 0.6                                              |
| <b>CITP</b>                     | 0.34 (-0.06-0.74)                    | -0.28 (-1.26-0.7)                 | 0.19                                             |
| <b>NT-proBNP</b>                | -5.21 (-9.77--0.65)                  | -10.55 (-23.81-2.7)               | 0.39                                             |
| <b>Systolic blood pressure</b>  | -10.89 (-14.4--7.38)                 | -8.63 (-13--4.27)                 | 0.45                                             |
| <b>Diastolic blood pressure</b> | -3.79 (-5.72--1.85)                  | -1.92 (-4.38-0.52)                | 0.29                                             |
| <b>Left atrial volume</b>       | -2.9 (-4.42--1.38)                   | -1.36 (-3.47-0.76)                | 0.23                                             |
| <b>Left ventricular mass</b>    | -3.4 (-6.12--0.67)                   | -0.04 (-4.1-4.01)                 | 0.16                                             |
